# Supplementary material
Source: PubMed Central journal article supplement (PMC3530951)
Supplement: Supp_Fig1.pdf [file Supp_Fig1.pdf]

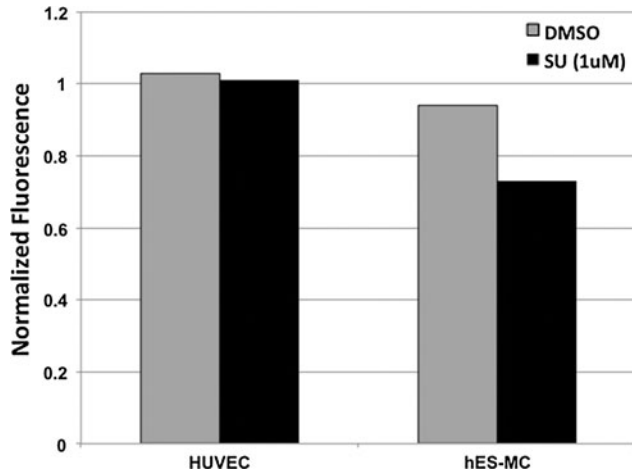

**SUPPLEMENTARY FIG. S1.** SU11274 cytotoxicity assay. Human umbilical vein endothelial cells (HUVECs) and human embryonic stem cell–mesenchymal cells (hES-MC) were tested at different doses of SU11274 and equivalent volumes of dimethyl sulfoxide. The fluorescence was normalized to untreated cells.
