# Supplementary material
Source: PubMed Central journal article supplement (PMC3530951)
Supplement: Supp_Fig2.pdf [file Supp_Fig2.pdf]

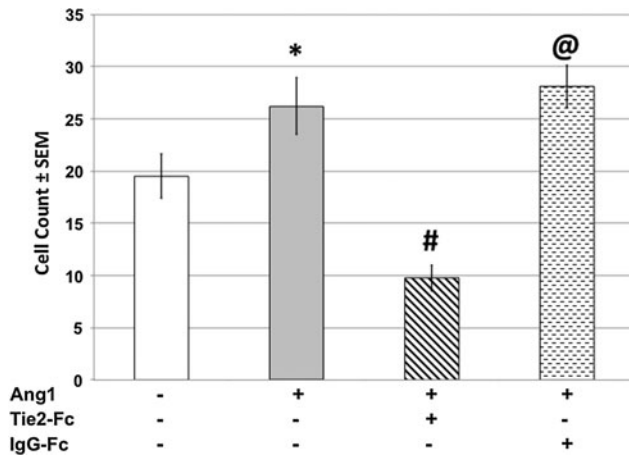

**SUPPLEMENTARY FIG. S2.** Tie2-Fc blockade of Ang1 induced HUVEC migration. Serum-starved (0.5% fetal bovine serum) HUVECs were placed in a transwell (8  $\mu$ m pore) and exposed to low serum media (base media = BM, *first bar*), BM with Ang1 (50 ng/mL, *second bar*), Ang1 with Tie2-Fc (20  $\mu$ g/mL, *third bar*), or Ang1 with IgG-Fc (20  $\mu$ g/mL, *fourth bar*). Ten random fields of view were acquired and cells were counted for each condition. BM control migrated at  $19.5 \pm 2.1$  cells/field, Ang1 migrated at  $26.2 \pm 2.7$  cells/field and was significantly higher than control ( $*p > 0.03$ ), Ang1/Tie2-Fc migrated at  $9.8 \pm 1.3$  cells/field and was significantly lower than both control and Ang1 alone ( $^{\#}p > 0.0001$  vs. control;  $p > 0.0001$  vs. Ang1), and Ang1/IgG-Fc was significantly different to control but not Ang1 ( $^{\textcircled{a}}p > 0.002$  vs. control;  $p = 0.3$  vs. Ang1).
