# Supplementary material
Source: PubMed Central journal article supplement (PMC3530951)
Supplement: Supp_Fig3.pdf [file Supp_Fig3.pdf]

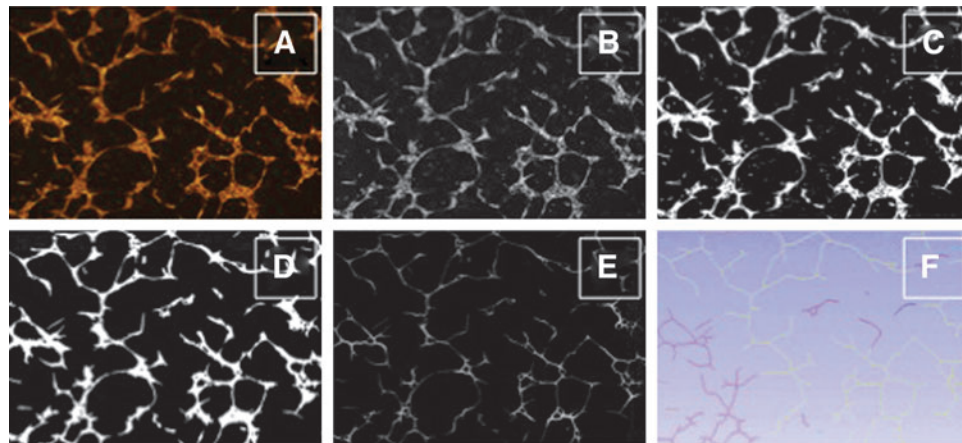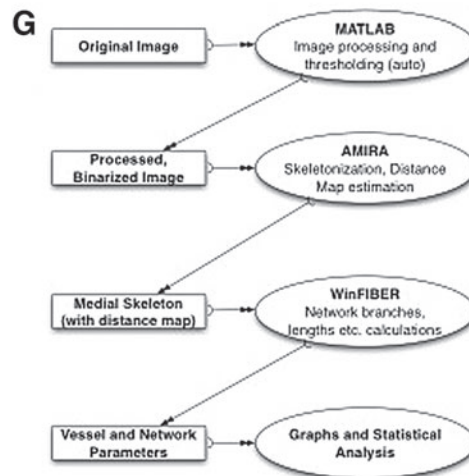

**SUPPLEMENTARY FIG. S3.** Image processing steps involved in quantification of network parameters. **(A)** Original image input to Matlab. **(B)** Processed grayscale image prior to thresholding. **(C)** Binarized image. **(D)** Size filtered and filled image output from Matlab. **(E)** Skeletonized image in Amira. Line thickness reflects image feature thickness at any point. **(F)** Medial skeleton analyzed for branching, connected segment lengths, and so on, in WinFiber. **(G)** Schematic of our image processing workflow. Original images are automatically processed within Matlab to provide binarized output image as in **(D)**, which is then skeletonized and quantified as in **(E, F)**.
