# Supplementary material
Source: PubMed Central journal article supplement (PMC3530951)
Supplement: Supp_Fig4.pdf [file Supp_Fig4.pdf]

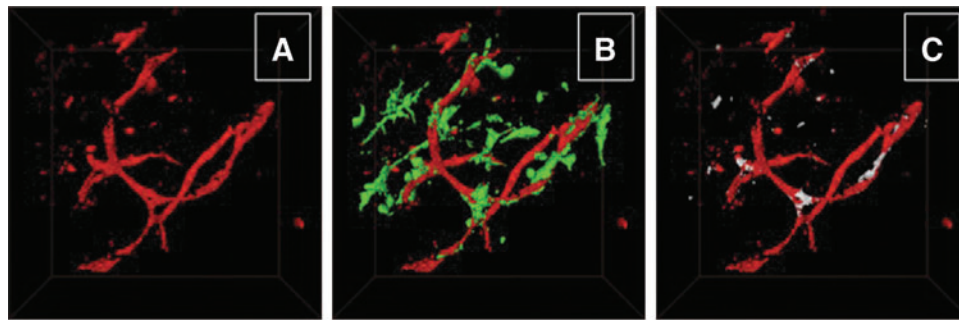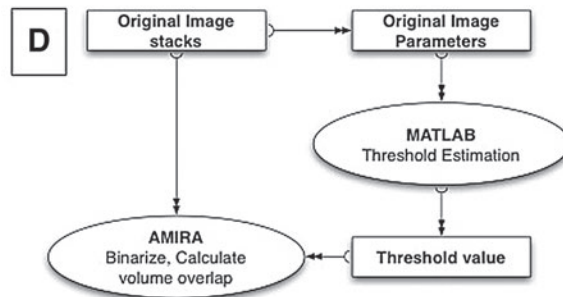

**SUPPLEMENTARY FIG. S4.** Estimation of shared voxels or overlap (white) between HUVEC networks (red) and hES-MCs (green). **(A)** An isosurface representation of a binarized image stack of HUVEC networks (red). **(B)** Similar isosurface representation of binarized image stack of hES-MCs (green), overlaid on the HUVEC representation. **(C)** The shared voxels or overlap (white) is similarly overlaid on HUVEC image. The white areas represent overlapping voxels between HUVECs and hES-MCs. **(D)** Schematic workflow of automated threshold generation in Matlab using image-stack-specific parameters, followed by further calculations within Amira.
